# Supplementary material for: Decoding Global AI Risk Perception Evolution: Intercultural drivers and Public Discourse Patterns in Algorithmic Societies
Source: Research Square preprint supplement (doi:10.21203/rs.3.rs-6468789/v1), 2025-07-25
Supplement: Supplementary file 1 [file d27de6dee68e35f6605b8c77.docx]

# Appendix

***Table A.1*** *Description of individual indicators for different continents*

| Continent | Economic Development Level | Technological Maturity | AI Policy and Regulatory Framework | Social Acceptance | Education Level | Health Security Index | Infrastructure Completeness | Government Effectiveness | Electoral Democracy Index | Income Level | Night Light Index | Gini Coefficient | Religious Influence | Corruption Control | Working Age Population Ratio | Life Expectancy |
| --- | --- | --- | --- | --- | --- | --- | --- | --- | --- | --- | --- | --- | --- | --- | --- | --- |
| Asia | Uneven development, from high-income countries to emerging markets | Relatively mature, concentrated in certain countries | Policies are developing, with strong regulation in some countries | High, especially in emerging markets | High, world-leading in some countries | Medium, with disparities in healthcare infrastructure | Uneven development, with well-developed infrastructure in some areas | Government effectiveness varies, weaker in some countries | Strong democracy in some countries | Medium to high, significant variation across countries | High, with advancing urbanization | Uneven, significant gap between high and low incomes | Medium to high, strong in some areas | Regulatory mechanisms are strengthening, with significant variation | High working-age population ratio | High, with good healthcare in some countries |
| Africa | Low, overall economically underdeveloped | Technologically lagging, with progress in some areas | Weak regulation, lacking comprehensive policies | Medium, improving but with reservations | Low, limited education resources | Healthcare infrastructure is underdeveloped | Infrastructure is underdeveloped, with a few more advanced cities | Low government effectiveness, widespread bureaucracy | Slow democratic progress in most countries | Low, predominantly low-income countries | Low, low electrification and urbanization levels | High, large income inequality | High, significant religious influence in politics and society | Widespread corruption, weak regulation | Low working-age population ratio | Low, with weak public health systems |
| Europe | High, developed economies | Highly mature, leading in R&D and application | Comprehensive, with strong AI regulatory frameworks | High, widespread public support for technology | High, advanced education systems | High level of health security | Well-developed, widespread infrastructure | Strong government effectiveness, efficient management | Developed democracy, high political transparency | High, high-income developed countries | High, widespread lighting infrastructure | Moderate, relatively small income inequality | Low, religion has minimal influence on society | Good corruption control, strict regulation | Moderate working-age population ratio | High, advanced healthcare systems |
| North America | High, globally leading economies | Highly developed, strong innovation capacity | Comprehensive, with the world’s strongest AI regulatory framework | High, public holds a positive attitude toward technology | High, rich educational resources | Strong health security, high medical standards | Well-developed infrastructure, technologically advanced | Strong government effectiveness, well-established management systems | Strong democratic system, transparent elections | High, high-income developed countries | High, advanced urbanization and infrastructure | Moderate, significant income inequality | Low, minimal religious influence | Good corruption control, strict regulation | Moderate working-age population ratio | High, advanced public health systems |
| South America | Medium, with rapid development in some countries | Gradually maturing, with expanding applications | Weak regulation, underdeveloped policy systems | Medium, with some acceptance of AI technology | Medium, with significant variation in education levels | Weak health security, underdeveloped public healthcare | Uneven infrastructure development, with some countries lagging behind | Low government effectiveness, widespread bureaucracy | Issues with democratic progress, with non-transparency in some countries | Medium to high, with significant variation across countries | Medium, with higher urbanization in some regions | High, large income inequality | Medium, with notable influence of religion in some countries | Widespread corruption, weak regulation | Moderate working-age population ratio | Medium, with room for improvement in healthcare |
| Oceania | Medium to high, with developed regions | Technologically mature, widely applied | Gradually improving, regulatory systems still under development | High, society is highly accepting of AI technology | High, relatively high education levels | Good health security | Well-developed infrastructure, stable transportation and electricity | Strong government effectiveness, efficient governance | Well-established democratic systems, transparent elections | Medium to high, with high incomes in some countries | Medium to high, with good lighting infrastructure in some regions | Moderate, with some income inequality | Low, minimal religious influence | Good corruption control, well-established regulatory systems | Moderate working-age population ratio | High, advanced public health and healthcare systems |

***Table A.2*** *Variable explanation path of influence on AI risk perception*

| Variable Name | Feature Importance (Mean) | Confidence Interval (95%) | Impact Direction (Positive/Negative) | Variable Explanation | Path of Influence on AI Risk Perception |
| --- | --- | --- | --- | --- | --- |
| Income | 0.037 | 0.034 - 0.040 | Positive | Income level influences public acceptance of AI technologies. Higher-income groups are more likely to trust technology and see its potential benefits, while lower-income groups are more focused on negative impacts. | Higher income correlates with greater public acceptance of AI, especially regarding its role in improving quality of life and promoting economic growth. |
| Infrastructure Completeness | 0.035 | 0.032 - 0.038 | Positive | Well-developed infrastructure facilitates the widespread use of AI, particularly in smart cities and industrial automation, leading to higher trust in technology. | Regions with better infrastructure are more capable of adopting AI, leading to greater public acceptance and confidence in the technology. |
| Global Health Security Index | 0.031 | 0.028 - 0.034 | Positive | Regions with a high health security index tend to trust AI applications in healthcare and public health, as the technology can help enhance the ability to respond to emergencies. | Higher health security levels lead to a more positive public attitude toward AI in health and safety applications, where AI is seen as a valuable tool for public health. |
| Quality of Regulations | 0.029 | 0.027 - 0.031 | Positive | In regions with robust regulations, public trust in AI is higher, especially concerning privacy protection, data governance, and algorithmic transparency. | Higher regulatory quality increases public confidence in AI, especially in sensitive areas like finance and healthcare, and reduces concerns about privacy and data security. |
| Electoral Democracy Index | 0.027 | 0.024 - 0.030 | Positive | In countries with well-functioning electoral democracies, the public tends to trust government-led oversight and transparency in technology. | In regions with high democratic transparency, the public believes the government can effectively oversee AI's use, ensuring it does not negatively impact society, thus facilitating broader public sector AI applications. |
| Education Level | 0.026 | 0.024 - 0.028 | Positive | Higher education levels contribute to better public understanding and acceptance of AI, particularly regarding its ethical implications and potential benefits. | The higher the education level, the deeper the public's understanding of AI's complexities, increasing their ability to adapt to technological changes, while lower education levels lead to more cautious and skeptical attitudes. |
| Political Trust Index | 0.023 | 0.021 - 0.025 | Positive | In regions with higher political trust, the public has more confidence in the government’s ability to oversee AI, leading to greater acceptance of the technology. | When political trust is high, the public believes the government can effectively address potential risks posed by AI, such as privacy breaches and algorithmic bias. In low-trust regions, distrust in technology grows. |
| Night Light Index | 0.021 | 0.019 - 0.023 | Positive | The Night Light Index serves as a proxy for regional economic and technological development. Regions with higher light indices tend to have more developed infrastructure and greater technology adoption. | In economically developed areas, AI applications are more widespread, particularly in urban management, automation, and public services, fostering higher public trust in AI. |
| Government Effectiveness | 0.02 | 0.018 - 0.022 | Positive | In regions with high government effectiveness, the public trusts the government’s ability to promote and regulate AI applications. | In regions with strong government performance, the public holds a positive view of the government’s role in guiding technology, especially in terms of transparency, policy implementation, and data governance. |
| Religious Influence | 0.018 | 0.016 - 0.020 | Negative | In regions with strong religious influence, the public exhibits greater skepticism toward AI’s ethical implications. | In regions with strong religious influence, there are cultural concerns about AI applications, especially regarding ethical and moral issues, which may limit the use of the technology, particularly in parts of Africa and the Middle East. |
| Gini Coefficient | 0.016 | 0.014 - 0.018 | Negative | Income inequality exacerbates public resistance to AI, with concerns that AI could further widen societal disparities. | In areas with large income gaps, the public fears that while AI may boost productivity, it could also exacerbate social inequalities, making the technology appear as a tool to reinforce existing inequalities. |
| Corruption Control Index | 0.015 | 0.013 - 0.017 | Positive | In countries with good corruption control, the public has greater trust in the government’s ability to apply AI effectively, particularly in public administration and governance. | In low-corruption regions, the public believes AI can enhance government governance, while in regions with high corruption, there is concern that AI could be used to increase misuse of government power. |
| Liberal Component Index | 0.013 | 0.011 - 0.015 | Positive | In more liberal countries, the public is more accepting of AI and trusts it more, especially in terms of safeguarding civil rights and freedoms. | In regions with high levels of liberty, the public trusts that AI can be used in a framework that protects individual rights and freedoms, fostering transparency and fairness in its applications. |
| Life Expectancy | 0.012 | 0.010 - 0.014 | Positive | In regions with higher life expectancy, the public has more trust in AI applications in healthcare, believing the technology can improve quality of life and extend longevity. | In regions with higher life expectancy, the public is more willing to accept AI in healthcare, where its positive effects on health and longevity are more easily understood and accepted. |
| Population aged 15 to 64 | 0.01 | 0.008 - 0.012 | Positive | This group is the primary audience for AI technologies, showing higher acceptance and frequent use, especially in productivity tools and consumer technologies. | In regions with a higher proportion of young people, the public has greater acceptance and trust in AI, particularly in areas of career transition, skill development, and convenience in daily life. |
| Population | 0.008 | 0.006 - 0.010 | Positive | In countries or regions with larger populations, the demand for AI is higher, particularly in public services, transportation management, and urban planning. | In densely populated areas, AI can effectively help manage resources and optimize public services, leading to higher public acceptance and more pronounced technological impacts. |

***Table A.3*** *The specific impact of each indicator on AI risk perception*

| Variable Name | SHAP Mean Contribution | Confidence Interval (95%) | Contribution Direction (Positive/Negative) | Variable Explanation | Pathway of Influence on AI Risk Perception |
| --- | --- | --- | --- | --- | --- |
| Income | 0.015 | 0.012 - 0.018 | Positive (Higher income is positively correlated) | Income levels influence public attitudes towards AI technology. Higher-income groups are more likely to accept new technologies, while lower-income groups are more concerned about automation and unemployment risks associated with AI. | The higher the income, the more the public accepts AI. In lower-income regions, there is greater sensitivity to the automation-induced unemployment and income inequality risks, leading to resistance toward AI technology. |
| Infrastructure Completeness | 0.014 | 0.011 - 0.017 | Positive (More complete infrastructure leads to higher acceptance) | Well-developed infrastructure supports the widespread application of AI, helping to improve the transparency and operability of the technology. In areas with poorer infrastructure, there may be distrust towards the deployment of AI technology. | The more complete the infrastructure, the greater the public’s trust in AI technology. Poor infrastructure raises concerns about the safety and effectiveness of the technology, hindering its adoption. |
| Global Health Security Index | 0.011 | 0.009 - 0.013 | Positive (Higher health security is positively correlated) | In regions with higher Global Health Security Index, public trust in technology is higher, particularly in the public health sector, where AI is perceived to improve healthcare efficiency and respond to crises. | In areas with higher health security levels, the public holds a more positive view of AI. In regions with lower health security, there is more skepticism about the effectiveness of technological interventions, which increases resistance to AI adoption. |
| Quality of Regulations | 0.009 | 0.007 - 0.011 | Positive (Better regulations increase trust) | High-quality legal regulations enhance public trust in AI, especially concerning data privacy and technological ethics. In regions with well-established regulations, the public perceives lower privacy risks associated with AI. | Transparent and robust regulatory oversight helps increase public trust in AI, particularly regarding data use and privacy protection, reducing concerns about technological risks. |
| Electoral Democracy Index | 0.008 | 0.006 - 0.010 | Positive (Higher democratic transparency increases trust) | In regions with higher Electoral Democracy Index, the public has higher expectations for transparency and fairness in technology. People trust that the government can effectively oversee the use of AI, particularly in public service sectors. | In regions with well-established democratic systems, the public believes AI technology can be applied fairly and transparently in public administration. In regions with weaker democratic systems, there is a trust deficit, making AI adoption more challenging. |
| Education Level | 0.007 | 0.005 - 0.009 | Positive (Higher education correlates with higher acceptance) | In areas with higher education levels, the public's ability to understand and accept AI technology is greater. In regions with fewer educational resources, there is limited understanding of the technology, leading to resistance or concern. | The higher the education level, the stronger the public's positive perception of AI and the greater the acceptance of the technology. In areas with lower education levels, there is less understanding of AI's complexity and impact, which increases public concern and resistance. |
| Political Trust Index | 0.005 | 0.003 - 0.007 | Positive (Higher political trust increases technological trust) | In regions with higher political trust, the public has greater confidence in the application of AI technology, especially in public administration, healthcare, and education, trusting the government to effectively manage the risks associated with AI. | In regions with higher political trust, the public has more confidence in AI, particularly in government-led projects. In areas with lower political trust, there is more skepticism about the government's ability to regulate AI effectively. |
| Night Light Index | 0.004 | 0.002 - 0.006 | Positive (Higher development correlates with higher acceptance) | The Night Light Index serves as a proxy for regional economic development and infrastructure. Regions with higher light indices typically have more advanced economies and greater acceptance of AI, while areas with lower indices are more conservative. | In economically developed regions with better infrastructure, the public has a positive attitude toward AI applications. In less developed areas, there is lower acceptance of AI and greater concern over potential risks and negative impacts. |
| Government Effectiveness | 0.003 | 0.001 - 0.005 | Positive (Higher government effectiveness increases trust in technology) | In regions with higher government effectiveness, the public believes that the government can effectively promote AI technology and regulate its application. In regions with weaker government effectiveness, there are concerns that AI regulation may be ineffective. | In regions with strong government effectiveness, the public has more confidence in the government's ability to regulate and promote healthy AI development. In areas with weaker government effectiveness, there are concerns about technology running out of control and causing negative social impacts. |
| Sum of 7 Other Features | 0.002 | 0.0005 - 0.0035 | Positive/Negative depending on feature combination | This category includes several features, such as socio-cultural factors and regional differences. The influence of these features on AI risk perception depends on specific social and regional contexts. | These additional features can influence AI perception differently based on cultural, social backgrounds, and economic development stages. Regional policies and cultural differences may affect the strength of AI acceptance and risk perception. |

***Table A.4*** *Key drivers of regional variations in risk perception and future trend prediction*

| Region | Evolution of Risk Perception | Key Drivers | Social and Policy Impact | Future Trend Prediction |
| --- | --- | --- | --- | --- |
| Asia | Increasing labor market risks, rising concerns about privacy | - Accelerated technological automation | - Public policy monitoring of AI remains loose, with some countries gradually introducing data privacy regulations | - AI's impact on the labor market is expected to become more pronounced, with governments likely to introduce more data protection policies, especially concerning privacy and security. |
|  |  | - Incomplete data privacy laws | - Widespread promotion of AI by governments and businesses is accelerating social inequality |  |
|  |  |  | - Social inequality is intensifying |  |
| Africa | Shift from fear of technology to focus on ethics | - Underdeveloped infrastructure | - In some regions, the public remains skeptical of AI technology, viewing it as conflicting with local cultural values | - There will likely be stronger ethical debates on AI, particularly regarding religion and social norms, with increased attention on security vulnerabilities brought by AI. |
|  |  | - Insufficient technological education | - Ethical review and moral responsibility of AI have become focal points in public discourse |  |
|  |  |  | - Strong influence of religion and cultural ethics |  |
| Europe | Privacy and security concerns remain high, with increasing discussions on ethics and transparency | - Highly developed legal framework | - Privacy laws such as GDPR impose constraints on the use of data by businesses and governments | - Europe will continue to lead global AI ethics standards, with stricter regulations on privacy and data security, while technological transparency will be a central issue in discussions. |
|  |  | - Strong data protection awareness | - AI technology companies face dual pressure from the public and policymakers regarding algorithm transparency and ethical responsibility |  |
|  |  |  | - High expectations for technological transparency and ethical responsibility |  |
| North America | Growing reliance on decision support, widespread concerns about security vulnerabilities | - Advanced technological infrastructure | - AI decision support is now widely integrated into government, healthcare, and financial sectors | - Dependence on AI for public decision-making is expected to increase, alongside stronger regulations around security vulnerabilities, particularly in the finance and healthcare sectors. |
|  |  | - Extensive use of AI in decision support systems | - Incidents of data breaches and system intrusions have heightened public resistance to security vulnerabilities |  |
|  |  |  | - High-profile security breach incidents are frequent |  |
| South America | Increased expectations for technological innovation, but persistent concerns over job risks | - Economic transformation pressure | - Government support for AI technology focuses mainly on innovation and economic transformation | - Discussions on innovation and technological sovereignty will intensify, with governments promoting more innovation projects, although AI-related job risks will remain a central concern for society and policymakers. |
|  |  | - Insufficient technology adoption, weak infrastructure | - However, public concern over AI replacing jobs remains significant, especially in the industrial and service sectors |  |
|  |  |  | - Increased focus on innovation awareness and technological sovereignty |  |
| Oceania | Focus on technological transparency and ethical responsibility, deepening concerns over privacy | - Emphasis on technological transparency | - Government demands for AI companies to increase transparency and explainability of algorithms | - The public will continue to demand greater transparency and fairness from governments and companies in AI technology, with privacy issues remaining a primary concern for both the government and businesses. |
|  |  | - Growing attention to data privacy issues | - Public and government support for AI use in public decision-making (e.g., urban management) |  |
|  |  |  | - High societal expectations for AI application in public sectors |  |

***Table A.5*** *Core socio-economic factors contributing to differences in risk perception*

| Driver Category | Core Drivers | Deep Influence on Public Perception of AI Risks |
| --- | --- | --- |
| Macroeconomic Structure | Economic inequality and industrial transition pressure: Income disparities and economic restructuring intensify fears of AI replacing traditional labor, especially in developing countries. | Job market and economic uncertainty: The public in Asia (29.48%) and South America (17.54%) express strong anxiety about the potential for AI and automation to significantly reduce employment opportunities. |
| Social and Cultural Capital | Differences in education and technological literacy: Technical education and social-cultural backgrounds influence public understanding and trust in AI technology. Regions with high-quality education are more open to AI applications. | Ethical and social value conflicts: The public in Oceania (22.07%) and Europe (19.87%) focus on the ethical challenges posed by AI, particularly concerns over algorithmic bias and decision-making transparency. |
| Governance and Regulatory Systems | Policy consistency and government credibility: In countries with high political trust and clear policies, public trust in AI technology is more stable, especially concerning privacy and security protections. | Strong demand for privacy and data security: The public in North America (14.86%) and Europe (18.71%) is highly sensitive to AI's role in privacy protection and data security, with heightened expectations in these areas. |
| Technological Development Path | Technological maturity and infrastructure expansion: Advanced technology ecosystems and infrastructure development support AI deployment, increasing public recognition of its capabilities. | Decision support and innovation incentives: The public in North America (27.23%) and South America (21.19%) have high expectations for AI's role in decision support and improving governance efficiency, viewing it as a potential transformational tool. |
| Trust and Risk Perception | Information transparency and perceived risk exposure: Access to information and transparency directly impact public risk perception, with negative information often reinforcing skepticism and perceived risks. | Fear of insufficient information transparency: The public in Oceania (25.14%) and Africa (21.81%) are skeptical of AI's potential risks due to perceived shortcomings in government or corporate transparency. |
| Globalization and Technology Diffusion | International standardization and global technology transfer: Cross-border technology standards and international cooperation promote the global diffusion of AI but also heighten concerns in developing countries about technological dependence and autonomy. | Concerns over global technological imbalance: In South America (28.51%) and Asia (17.62%), there are worries about control over AI standards and autonomous innovation, with an emphasis on technological sovereignty and innovation capabilities. |
| Ethics and Social Norms | Religious ethics and social responsibility: In some regions, religion and traditional culture deeply influence public moral judgment and acceptance of AI, particularly in developing countries. | Rising discussions on ethical norms: The public in Africa (17.94%) and Oceania (22.07%) are highly concerned with whether AI aligns with societal values and religious ethics, driving debates on ethical standards. |
| Historical Events and External Shocks | Historical data breaches and technological failures: Past technical failures and data breaches continue to impact public confidence in AI, creating enduring fears and distrust. | Deep concerns over privacy violations and security vulnerabilities: In Europe (22.16%) and North America (21.64%), past data breaches and system failures have heightened public anxiety about AI's safety. |
| Media and Social Cognition Construction | Media narratives and risk amplification: Media portrayal of AI, both positive and negative, significantly shapes public perception. Negative reporting often amplifies risk perception and triggers societal panic. | Amplification of safety risks through media: Media-driven risk amplification has led the public in Europe and North America to view AI as posing serious safety hazards, increasing demands for stricter regulation. |
| Geopolitical and Environmental Factors | Urbanization and geopolitical technological influence: Highly urbanized regions are more receptive to AI applications, while geopolitical conflicts can lead to greater resistance to AI introduction in certain areas. | Uncertainty in technological innovation: Geopolitical conflicts affect public attitudes toward AI technology, with Asia (17.62%) and South America (28.51%) emphasizing the importance of innovation autonomy and stringent regulation. |
